1 **Determinants of COVID-19 Incidence and Mortality in the US: Spatial Analysis**

2

3 Niranjan J. Kathe, MS, PhD<sup>1\*</sup> and Rajvi J. Wani, MS, PhD<sup>2</sup>

4

5 <sup>1</sup> Senior Manager, Complete HEOR Solutions, North Wales, PA, USA, 19454

6 <sup>2</sup> Real World Evidence Manager, Amgen Canada Inc, Mississauga, ON, Canada L5N 0A4

7 *#NK and RW joint first co-authorship*

8 **\*Corresponding Author:**

9 Niranjan J. Kathe, MS, PhD

10 Complete HEOR Solutions

11 North Wales, PA, USA 19454

12 [niranjan.kathe@outlook.com](mailto:niranjan.kathe@outlook.com) | c: +1-402.215.5528

13 **Running Title:** Ecological Determinants of COVID-19 Incidence and Mortality

14 **Conflicts of Interests Disclosure statement:**

15 No conflict of interest to report. Also, NK is an employee of Complete HEOR solutions, and the  
16 research presented in this paper is not related to Complete HEOR Solutions. The opinions and  
17 viewpoints expressed by the authors do not reflect the opinions, beliefs, and viewpoints of Complete  
18 HEOR Solutions. RW is an Amgen employee and the publication is a result of outside work and not  
19 related to Amgen. The opinions and viewpoints expressed by the authors do not reflect the opinions,  
20 beliefs and viewpoints of Amgen Canada Inc.

21 **Keywords:** SARS-CoV-2, Coronavirus disease 2019, Public policy, Social Determinants of Health,  
22 Health status disparities, Spatial analysis

23 **Word count of Manuscript:** 2,994

24 **Word count of Abstract:** 249

25 **Tables:** 2

26 **Figures:** 3

27 **Supplementary Material:** 1

28 **Number of references:** 27

29

## 30 **Determinants of COVID-19 Incidence and Mortality in the US: Spatial Analysis**

### 31 **ABSTRACT**

32 **OBJECTIVES:** The US continues to account for the highest proportion of the global Coronavirus  
33 Disease-2019 (COVID-19) cases and deaths. Currently, it is important to contextualize the spread and  
34 success of mitigation efforts. The objective of this study was to assess the ecological determinants  
35 (policy, health behaviors, socio-economic, physical environment, and clinical care) of COVID-19  
36 incidence and mortality in the US.

37 **METHODS:** Data from the New York Times' COVID-19 repository (01/21/2020-10/27/2020), 2020  
38 County Health Rankings, 2016 County Presidential Election Returns, and 2018-2019 Area Health  
39 Resource File were used. County-level logged incidence and mortality rate/million were modeled using  
40 the Spatial Autoregressive Combined model and spatial lag model.

41 **RESULTS:** Counties with higher proportions of racial minorities (African American  $\beta= 0.007$ , Native  
42 Americans  $\beta= 0.008$ , Hispanics  $\beta= 0.015$ ), non-English speakers ( $\beta= 0.010$ ), population density  
43 ([logged]  $\beta= 0.028$ ), and air pollution ( $\beta= 0.062$ ) were significantly associated with high COVID-19  
44 incidence rates. Subsequently, counties with higher Republican voters ( $\beta= 0.017$ ), excessive drinkers  
45 ( $\beta= 0.107$ ), children in single-parent households ( $\beta= 0.018$ ), uninsured adults ( $\beta= 0.038$ ), racial  
46 minorities (African American  $\beta= 0.032$ , Native Americans  $\beta= 0.034$ , Hispanics  $\beta= 0.037$ ), females ( $\beta=$   
47  $0.101$ ), and population density ([logged]  $\beta= 0.270$ ), air pollution ( $\beta= 0.130$ ), and non-Whites/Whites'  
48 residential segregation ( $\beta= 0.014$ ) were significantly associated with high COVID-19 mortality rates.  
49 Additionally, longer state-level restrictions were associated with lower COVID-19 incidence and  
50 mortality rates.

51 **CONCLUSIONS:** The spatial models identified longer state-level restrictions, population density, air  
52 pollution, uninsured rate, and race/ethnicity as important determinants of the geographic disparities in  
53 COVID-19 incidence and mortality.

54

55 **Keywords:** SARS-CoV-2, Coronavirus disease 2019, Public policy, Social Determinants of Health,  
56 Health status disparities, Spatial analysis

57

## 58 INTRODUCTION

59 The Coronavirus Disease 2019 (COVID-19) pandemic continues to spread in the US and around  
60 the world. The US, as of January 11, 2021 recorded 22.6million COVID-19 cases and 375,141deaths.<sup>1</sup>  
61 The US cases and deaths continue to account for the largest share of global cases (25%) and global  
62 deaths(20%).<sup>1</sup> The COVID-19 pandemic containment in the US was challenging actors due to virus  
63 contagion characteristics, its pathophysiology, and socio-political factors. In response to the pandemic,  
64 by the first week of April, all but two states and local authorities imposed social distancing measures and  
65 restrictions. As of the writing of this study, many states who had eased phase 1 restrictions went on to  
66 implement phase 2 restriction policies to curb the surge in COVID-19 infections during the holiday  
67 season.<sup>2-5</sup>

68 Restriction measures such as the closure of business establishments, stay-at-home, and social  
69 distancing mandates severely impacted the economy. In response to the pandemic, the lawmakers passed  
70 the Coronavirus Aid, Relief, and Economic Security Act (CARES) Act,<sup>6</sup> with additional relief expected  
71 shortly. As of January 11, 2021, Moderna and Pfizer vaccines have received emergency use  
72 authorization by the FDA and are rolled out in phases. Other biopharmaceutical companies are  
73 conducting clinical trials for fifty-four COVID-19 vaccine candidates.<sup>7-9</sup> The current vaccine rollout will  
74 continue to gain momentum while other COVID-19 vaccines may receive market approval in the near  
75 future. Despite this progress, experts recommend that the public follow COVID-19 safety measures due  
76 to the slow initial rollout and uncertainties surrounding COVID-19 vaccines (virus mutations, duration  
77 of immunity, real world effectiveness, vaccine uptake, etc.).<sup>10</sup> In summary, fiscal, legislative, and  
78 scientific efforts are all underway to address the needs of the population in the current phase of the  
79 COVID-19 pandemic. However, the assessment of the impact of ecological contextual factors such as  
80 health behaviors, clinical care, socio-economic, and physical environment-related characteristics on the  
81 course of COVID-19 pandemic is also necessary. The contextual understanding from such a study is  
82 required to gauge which strategies work, to what extent, and for which groups. Having a thorough  
83 knowledge of these ecological contextual factors is critical to address the public health and economic  
84 challenges and prioritize resources.

85 Studies so far have generated predictive models for growth in COVID-19 incidence and  
86 mortality and estimated the impacts of some community-level factors on COVID-19 incidence and  
87 mortality. Millett *et al.* and Khanijahania *et al.* focused on assessing the ecological determinants of  
88 susceptibility to COVID-19 outcomes among predominantly African American counties, while Fielding-  
89 Miller *et al.* and Peters *et al.* performed a similar assessment along the rural-urban continuum.<sup>11-14</sup> Few

90 studies had assessed the spatial determinants of COVID-19 transmission.<sup>15-17</sup> Recently, Sun *et al.*  
91 assessed the relationship between various county-level determinants and COVID-19 incidence while  
92 Andersen *et al.* also identified high prevalence clusters.<sup>15,16</sup> These studies had evaluated the incidence  
93 and prevalence during the initial phase of the pandemic and limited the analysis to a few county-level  
94 factors. The goal of the current study was to assess the impact of county-level ecological factors, using  
95 spatial econometric analysis, on the cumulative COVID-19 incidence and mortality rate over an  
96 extended phase of the pandemic.

97

## 98 **METHODS**

### 99 ***Data source and study design***

100 The current study used county-level COVID-19 confirmed cases and deaths data from the New  
101 York Times repository extracted as of October 27, 2020, and included data up until that date.<sup>18</sup> The  
102 study used county-level characteristics from 2020 County Health Rankings data, 2018-2019 Area Health  
103 Resource File data, 2016 County Presidential Election Returns data, and state-level lockdown duration  
104 data was generated based on the lockdown start and end date obtained from Ballotpedia as of October  
105 27, 2020<sup>19-21</sup>. Counties from Alaska and Hawaii and counties with less than 25 cumulative cases as of  
106 October 27, 2020, were excluded from the analysis. The US counties ESRI Shapefile were obtained  
107 from the US Census Bureau.<sup>22</sup> The study employed a cross-sectional ecological study design to assess  
108 the association between county-level characteristics on the cumulative COVID-19 incidence cases and  
109 deaths.

### 110 ***Outcomes***

111 The county-level cumulative COVID-19 cases and COVID-19 deaths as of October 27, 2020  
112 (per million population) were the operational definition for COVID-19 incidence and mortality rate,  
113 respectively. The resulting incidence and mortality rates were log-transformed due to the skewed nature  
114 of the county-level cumulative incidence and mortality rates.

### 115 ***Covariates***

116 The covariates selected to predict the county-level incidence and mortality were based on the  
117 County Health Ranking framework. The framework categorizes health factors into four sub-categories,  
118 namely health behaviors, clinical care, socioeconomic factors, physical environment (**Figure 1**). Each of  
119 the sub-categories is further divided into individual components. Although the County Health Ranking  
120 model assigns weights to each of the components, they were not utilized in the current analysis as no  
121 composite rank score was calculated. The individual components were used as covariates in the

122 regression. The final list of county-level covariates included in the model is described in  
123 **Supplementary Table 1**. In addition to the above county-level factors, length of state-level lockdown  
124 duration and month (January/February/March) of the first reported case at the state-level were included  
125 as covariates. Finally, the county-level composition of the Republican voters was also added to  
126 determine the extent to which the county's community health was associated with voting preference for  
127 the 2016 presidential elections.

128 [INSERT FIGURE 1]

### 129 *Statistical Analyses*

130 Descriptive univariate statistics of the weighted county-level characteristics were generated. The  
131 presence of spatial correlation was confirmed by performing Moran's I test for correlation of ordinary  
132 least square regression residuals. Due to the spatial correlation in the data, the current study employed a  
133 spatial regression analysis approach. Two island counties were excluded from the spatial regression  
134 analysis. Prior research on spatial analysis of COVID-19 used the spatial autoregressive combined  
135 model (SAC) model to evaluate the association between period prevalence of COVID-19 and county-  
136 level characteristics<sup>15</sup>. The SAC model was also adopted for modeling cumulative incidence and deaths  
137 if both the spatial lag parameter ( $\rho$ ) and spatial error parameter ( $\lambda$ ) were statistically significant.  
138 However, model simplification was attempted when one of the parameters was not significant. A first-  
139 order queen spatial weight matrix was employed for all spatial models. The queen matrix defines  
140 neighbor relationships if the counties either share a border or a vertex. All analysis was performed in  
141 SAS Studio University Edition (Cary, NC), QGIS v 3.16.0 (Berne, Switzerland), and RStudio (R) v  
142 4.0.3 (Boston, Massachusetts).

143

### 144 **RESULTS**

145 The final analysis included data from 3,101 counties from the mainland US. Between January 20  
146 to October 27, 2020, the population-weighted cumulative incidence and mortality rates for the mainland  
147 US were 26,576 and 632 per million, respectively. **Table 1** demonstrates descriptive statistics of the  
148 incidence and mortality rates and county-level determinants, namely, health behaviors, clinical care,  
149 socio-economic, and physical environment factors. Fifteen states had a length of the lockdown of 59  
150 days or more, and 39 states reported their first case in the month of March. Overall, 2,499 counties  
151 leaned Republican (50% of the votes in the county were for the Republican presidential candidate in  
152 2016). The weighted proportion of adult smokers, adults with obesity, adults with physical inactivity,  
153 Medicare enrollees that were administered influenza vaccines and adults with some college education

154 were 15%, 29%, 23%, 19%, and 65%, respectively. Premature (<75 years) age-adjusted mortality was  
155 344 per 100,000. Among socio-economic factors, unemployment was 4%, 12% of adults were  
156 uninsured, the mean income inequality ratio was 5. About 12% were African Americans, 18%  
157 Hispanics, 1% Native Americans, and 4% population not proficient in English. The mean percentage of  
158 the population older than 65 years and less than 18 years were 16% and 23%, respectively. On average,  
159 19% of counties were rural, the homeownership rate was 65%, 33% of the children lived in single-parent  
160 households, and 18% of households had severe housing problems. At the county-level, the rate of  
161 primary care physicians (logged) and preventable hospitalization (logged) was 4 and 8, respectively.  
162 Importantly, no significant multicollinearity was observed in the analysis, as the VIF for the selected  
163 variables was less than 7.

164 [INSERT TABLE 1]

165

166 **Figure 2** presents the spatial distribution( septiles) of logged COVID-19 incidence rates. In the  
167 West, Oregon High desert and Twin Falls areas, New Mexico’s Navajo and Apache areas, and  
168 Washington’s Spokane areas had clusters of high incidence rates. In the Midwestern region, Tribal lands  
169 and the Great Plains regions, including North Dakota, South Dakota, Nebraska and Iowa (congruence of  
170 these borders near Sioux Falls area), Minnesota, Wisconsin (specifically Superior Upland area), and  
171 Kansas regions had clusters with high incidence rate clusters. In the South, the Delta region along the  
172 Mississippi river including states of Mississippi, Louisiana, Tennessee, central Alabama, and Arkansas  
173 had clusters of high incidence rates. The Corpus Christie area and area along the US-Mexico border had  
174 clusters of high incidence rates clusters. Additional high incidence rate clusters were found in the  
175 Tallahassee, Jacksonville, Savannah area, and Miami-Dade County area. Conversely, low incidence  
176 rates were in the Pacific-Northwest areas. The spatial distribution of the logged COVID-19 mortality  
177 rates (by septiles) presented in **Figure 3** demonstrated similar patterns. However, in the Northeastern  
178 region, high mortality rate clusters were found between the greater Philadelphia area and Boston  
179 Massachusetts. Contrarily, the mortality rate clusters in Wisconsin’s Superior Upland area were smaller  
180 compared to the incidence rate clusters.

181

182 [INSERT FIGURE 2]

183 [INSERT FIGURE 3]

184

185 **Table 2** presents the results from spatial regression models that assessed the impact of ecological  
186 determinants on COVID-19 incidence and mortality rates (logged). For the incidence rate SAC  
187 regression, the rho and lambda model parameters both were significant. However, only the rho  
188 parameter was significant for the mortality rate regression model. Therefore, the SAC model was used  
189 for incidence rate analysis, while the spatial lag model was used for mortality rate analysis. The analysis  
190 further tested the spatial correlation for the residuals of both models using Moran's I statistic. The  
191 Moran's I for the model residuals was not significant for the incidence rate (SAC model) and mortality  
192 rate (spatial lag model) regression, which indicated no significant spatial autocorrelation of residuals.  
193 The length of lockdown order, a policy-related factor, was significantly associated with the incidence  
194 rate. Compared to the counties that had no orders implemented, counties with an order length of 1-27  
195 days, 36-58 days, and 59 or more days had a 0.290, 0.228, and 0.335 unit decrease in logged COVID-19  
196 incidence rates, respectively. Among clinical care-related factors, a unit increase in logged primary care  
197 physicians' rate, logged preventable hospitalization rates and logged hospital beds were all associated  
198 with 0.011, 0.045, and 0.004 unit increase in logged COVID-19 incidence rates, respectively. A  
199 percentage point increase in influenza vaccinations and Republican political leaning was associated with  
200 a 0.003 and 0.002-unit increase in logged COVID-19 incidence rates, respectively. Among other socio-  
201 economic factors, a percentage point increase in adults with some college education, children in single-  
202 parent households, and social association rate and logged median income resulted in 0.004, 0.003, 0.003,  
203 and 0.158 unit decreases in logged incidence rates, respectively. Specifically, among the racial/ethnic  
204 factors, a percentage point increase in African Americans, Native Americans, Hispanics, and those not  
205 proficient in English was associated with 0.007, 0.008, 0.015, and 0.010-unit increase in logged  
206 incidence rates, respectively. Conversely, a percentage point increase in 65 years or older and those less  
207 than 18 years of age was associated with a 0.020 and 0.011 unit decrease in logged incidence rates. A  
208 unit increase in African American and white residential segregation and a percentage point increase in  
209 rurality were associated with a 0.002 and 0.001 unit decrease in logged incidence rates. On the other  
210 hand, a unit increase in white and non-white residential segregation and particulate matter air pollution  
211 were associated with an 0.003 and 0.062-unit increase in incidence rates, respectively.

212 [INSERT TABLE 2]

213 Subsequently, when compared to the counties that had no orders implemented, counties with  
214 order length of 28-35 days, 36-58 days, and 59 or more days had a 0.824, 0.866, and 1.006 unit decrease  
215 in logged COVID-19-related mortality rates, respectively. Compared to counties from states that first  
216 reported COVID-19 cases in January, those with the first reported case in February were associated with



217 a 0.628-unit decrease in logged mortality rates. Among health behaviors, a 1% increase in excessive  
218 drinking, influenza vaccinations resulted in a 0.107 and 0.039 increase in logged mortality rates. Logged  
219 primary care physicians' rate and hospital beds resulted in 0.234 and 0.033 units increase in logged  
220 mortality rates. Among socio-economic factors, a 1% increase in Republicans, females, children in  
221 single-parent households, and uninsured adults resulted in a 0.017, 0.101, 0.018, and 0.038 units  
222 increase in logged mortality rates, respectively. However, a 1% increase in adults with some college  
223 education was negatively associated i.e. 0.041 decreases in logged mortality rates. Among racial/ethnic  
224 composition, a 1% increase in African Americans, Native Americans, and Hispanics were associated  
225 with 0.032, 0.034, and 0.037 unit increase in logged mortality rates. The logged population density was  
226 also positively associated with incidence and mortality rates by 0.028 and 0.270-units, respectively.  
227 Additionally, a 1% increase in air pollution, and residential segregation- Non-White/Whites resulted in a  
228 0.130 and 0.014 increase in logged mortality rates. Whereas African Americans/White residential  
229 segregation, and rurality were negatively associated with mortality rates by 0.010 and 0.014 units.

## 230 **DISCUSSION**

231 To the best of our knowledge, this is the first spatial analysis study that captured and assessed the  
232 cumulative incidence and deaths during the majority of the year 2020 (January 21 to October 28, 2020)  
233 of the COVID-19 pandemic in the US. The study found that counties with higher proportions of  
234 Republican voters, social association rates, racial minorities (African Americans, Native Americans, and  
235 Hispanics), those not proficient in English and counties with higher residential segregation between non-  
236 Whites & Whites, population density, pollution-particulate matter were associated with higher incidence  
237 rates. However, counties with longer length of stay-at-home orders, a higher proportion of adults with  
238 some college education, high-income, elderly, children, rurality, and higher segregation between African  
239 Americans & Whites had lower incidence rates. Correspondingly, counties with higher Republican  
240 voters, excessive drinkers, children in single-parent households, uninsured adults, racial minorities  
241 (African Americans, Native Americans, and Hispanics), females, and higher population density,  
242 pollution-particulate matter, and residential segregation between non-Whites & Whites had higher  
243 COVID-19 mortality rate.

244 Few studies have assessed the impact of different ecological factors on COVID-19 incidence and  
245 mortality rates in the US and worldwide. Similar to the current study, Peters *et al.* reported higher age,  
246 population density, uninsured rate to be associated with increased susceptibility to COVID-19 outcomes  
247 <sup>13</sup>. Khazanchi *et al.* and Nayak *et al.* also reported a similar association between higher county-level  
248 susceptibility score and higher incidence of COVID-19 incidence and deaths <sup>12,23</sup>. Similar to our study,



249 Liang *et al.* also assessed the impact of air pollution level and found increased air pollution to be  
250 associated with an increased mortality rate<sup>24</sup>. While Fielding-Miller *et al.* reported higher COVID-19  
251 mortality for counties with higher non-English speaking populations, our study showed higher incidence  
252 rates among this group<sup>14</sup>. Also, in agreement with the current study, other studies have reported high  
253 incidence and mortality rates in counties with greater proportions of racial minorities (Native  
254 Americans, Hispanics, and African Americans)<sup>12,15,25</sup>. Moreover, with an increase in population density,  
255 incidence and mortality rates increased, which has been reported by Sun *et al.* Unlike this study, Mollalo  
256 *et al.* spatial analysis found that increase in household income was associated with an increased  
257 incidence rate<sup>26</sup>. However, that same study reported that an increase in providers (for example nurse  
258 practitioners) increased incidence rates, which was similar to our findings. Allcott *et al.* and Goolsbee *et*  
259 *al.* also have pointed out ‘partisanship’ as a risk factor for non-adherence to preventive guidelines and  
260 mask use. Our study also observed that higher Republican-leaning counties were associated with higher  
261 incidence and mortality<sup>27,28</sup>. Interestingly, similar to Sun *et al.*, the current study also reported a lower  
262 incidence among counties with higher proportions of people over 65 years of age<sup>15</sup>.

263 The study has important limitations. First, log transforming the outcomes i.e. cumulative  
264 incidence and mortality rates as a linear dependent variable may mask the variations across counties. To  
265 our understanding, there is no software package currently available that runs a spatial lag model with a  
266 dependent variable with Poisson or Binomial distribution and thus, this study transformed the outcomes  
267 in their logarithmic form. Given the cross-sectional nature of the study, no causal inferences can be  
268 made. There are considerable differences in the testing rates across regions and counties and can  
269 influence the observed incidence rate. The list of variables is by no means comprehensive and does not  
270 include several other factors such as mobility, local restriction policies (county or city-level),  
271 compliance with local and federal prevention guidelines. The current analysis is ecological in nature and  
272 no direct inferences can be drawn at the individual level.

## 273 CONCLUSION

274 The findings of this study are more insightful than the mere coronavirus count meters and data  
275 visualizations that depict the spread of the COVID-19 pandemic. The current spatial models  
276 incorporated a comprehensive list of factors to ensure that the results, when parsed, offer a multi-faceted  
277 explanatory power. For illustration, these models helped identify factors including policy-related factors  
278 (i.e. length of order), health behaviors (example: excessive drinking), clinical care (example: preventable  
279 hospitalization rate), socio-economic factors (example: race/ethnicity, median income, uninsurance rate,  
280 education), and physical environment (example: population density, air pollution-particulate matter,

281 rurality, residential segregation among races, homeownership) as some of the important determinants of  
282 the geographic disparities in COVID-19 incidence and mortality. As per prior research, this study  
283 reaffirms that policy restrictions have helped to limit the COVID-19 incidence and mortality. This study  
284 highlights the plausible effect of one's residential location, vicinity, and local policymakers; and the  
285 connectivity to the neighboring counties on the incidence and mortality of COVID-19. As the country is  
286 facing the next wave of pandemic, the study findings have important policy implications and guidance  
287 on identifying areas at greater risk of infection and mortality. As the pandemic gains momentum in the  
288 rural areas, especially in the Midwest and South, contextualized policies at the local level that align with  
289 state and federal policies will be necessary to contain the next wave.

290

291

292 **REFERENCES**

- 293 1. Cases in the U.S. *CDC*, [https://www.cdc.gov/coronavirus/2019-ncov/cases-updates/cases-in-](https://www.cdc.gov/coronavirus/2019-ncov/cases-updates/cases-in-us.html)  
294 [us.html](https://www.cdc.gov/coronavirus/2019-ncov/cases-updates/cases-in-us.html) (accessed 15 November 2020).
- 295 2. Map of COVID-19 case trends, restrictions and mobility. *USA Today*, 27 November 2020,  
296 <https://www.usatoday.com/storytelling/coronavirus-reopening-america-map/> (27 November  
297 2020).
- 298 3. Yasmeen Wafai. What you can and can't do under Washington's newest coronavirus stay-home  
299 restrictions. *Seattle Times*, 16 November 2020, [https://www.seattletimes.com/life/what-you-can-](https://www.seattletimes.com/life/what-you-can-and-cant-do-following-washingtons-newest-november-coronavirus-lockdown-restrictions/)  
300 [and-cant-do-following-washingtons-newest-november-coronavirus-lockdown-restrictions/](https://www.seattletimes.com/life/what-you-can-and-cant-do-following-washingtons-newest-november-coronavirus-lockdown-restrictions/) (16  
301 November 2020).
- 302 4. Matt Olberding. Hospitals to further restrict elective surgeries due to COVID-19. *Lincoln Journal*  
303 *Star*, 13 November 2020, [https://journalstar.com/lifestyles/health-med-fit/health/hospitals-to-](https://journalstar.com/lifestyles/health-med-fit/health/hospitals-to-further-restrict-elective-surgeries-due-to-covid-19/article_3e0b67ee-c06e-5967-aa16-25731057af40.html)  
304 [further-restrict-elective-surgeries-due-to-covid-19/article\\_3e0b67ee-c06e-5967-aa16-](https://journalstar.com/lifestyles/health-med-fit/health/hospitals-to-further-restrict-elective-surgeries-due-to-covid-19/article_3e0b67ee-c06e-5967-aa16-25731057af40.html)  
305 [25731057af40.html](https://journalstar.com/lifestyles/health-med-fit/health/hospitals-to-further-restrict-elective-surgeries-due-to-covid-19/article_3e0b67ee-c06e-5967-aa16-25731057af40.html) (13 November 2020).
- 306 5. Travel restrictions issued by states in response to the coronavirus (COVID-19) pandemic, 2020-  
307 2021 - Ballotpedia,  
308 [https://ballotpedia.org/Travel\\_restrictions\\_issued\\_by\\_states\\_in\\_response\\_to\\_the\\_coronavirus\\_\(C](https://ballotpedia.org/Travel_restrictions_issued_by_states_in_response_to_the_coronavirus_(COVID-19)_pandemic,_2020-2021#Travel_restrictions.2C_advisories.2C_and_recommendations_by_state)  
309 [OVID-19\)\\_pandemic,\\_2020-](https://ballotpedia.org/Travel_restrictions_issued_by_states_in_response_to_the_coronavirus_(COVID-19)_pandemic,_2020-2021#Travel_restrictions.2C_advisories.2C_and_recommendations_by_state)  
310 [2021#Travel\\_restrictions.2C\\_advisories.2C\\_and\\_recommendations\\_by\\_state](https://ballotpedia.org/Travel_restrictions_issued_by_states_in_response_to_the_coronavirus_(COVID-19)_pandemic,_2020-2021#Travel_restrictions.2C_advisories.2C_and_recommendations_by_state) (accessed 21  
311 January 2021).
- 312 6. CHAPPELOW J. Coronavirus Aid, Relief, and Economic Security (CARES) Act. *Investopedia*.
- 313 7. Corum J, Wee S-L, Zimmer C. Covid-19 Vaccine Tracker: Latest Updates - The New York  
314 Times. *The New York Times*, [https://www.nytimes.com/interactive/2020/science/coronavirus-](https://www.nytimes.com/interactive/2020/science/coronavirus-vaccine-tracker.html?auth=login-google)  
315 [vaccine-tracker.html?auth=login-google](https://www.nytimes.com/interactive/2020/science/coronavirus-vaccine-tracker.html?auth=login-google) (2020, accessed 27 November 2020).
- 316 8. Pfizer's covid vaccine is more than 90 percent effective in first analysis, company reports - The  
317 Washington Post, [https://www.washingtonpost.com/health/2020/11/09/pfizer-coronavirus-](https://www.washingtonpost.com/health/2020/11/09/pfizer-coronavirus-vaccine-effective/)  
318 [vaccine-effective/](https://www.washingtonpost.com/health/2020/11/09/pfizer-coronavirus-vaccine-effective/) (accessed 27 November 2020).
- 319 9. Promising Interim Results from Clinical Trial of NIH-Moderna COVID-19 Vaccine | National  
320 Institutes of Health (NIH), [https://www.nih.gov/news-events/news-releases/promising-interim-](https://www.nih.gov/news-events/news-releases/promising-interim-results-clinical-trial-nih-moderna-covid-19-vaccine)  
321 [results-clinical-trial-nih-moderna-covid-19-vaccine](https://www.nih.gov/news-events/news-releases/promising-interim-results-clinical-trial-nih-moderna-covid-19-vaccine) (accessed 27 November 2020).
- 322 10. Scipioni J. Fauci: Why still need masks, social distancing after Covid-19 vaccine. *CNBC Make it,*

- 323 16 November 2020, <https://www.cnbc.com/2020/11/16/fauci-why-still-need-masks-social->  
324 [distancing-after-covid-19-vaccine.html](https://www.cnbc.com/2020/11/16/fauci-why-still-need-masks-social-distancing-after-covid-19-vaccine.html) (16 November 2020, accessed 27 November 2020).
- 325 11. Millett GA, Jones AT, Benkeser D, et al. Assessing differential impacts of COVID-19 on black  
326 communities. *Ann Epidemiol* 2020; 47: 37–44.
- 327 12. Khanijahani A. County-Level Proportions of Black and Hispanic populations, and Socioeconomic  
328 Characteristics in Association with Confirmed COVID-19 Cases and Deaths in the United States.  
329 *medRxiv* 2020; 1–23.
- 330 13. Peters DJ. Community Susceptibility and Resiliency to COVID-19 Across the Rural-Urban  
331 Continuum in the United States. *J Rural Heal* 2020; 36: 446–456.
- 332 14. Fielding-Miller RK, Sundaram ME, Brouwer K. Social determinants of COVID-19 mortality at  
333 the county level. *medRxiv Prepr Serv Heal Sci* 2020; 2020.05.03.20089698.
- 334 15. Sun F, Matthews SA, Yang T-C, et al. A spatial analysis of the COVID-19 period prevalence in  
335 U.S. counties through June 28, 2020: where geography matters? *Ann Epidemiol*. Epub ahead of  
336 print 2020. DOI: 10.1016/j.annepidem.2020.07.014.
- 337 16. Andersen LM, Harden SR, Sugg MM, et al. Analyzing the spatial determinants of local Covid-19  
338 transmission in the United States. *Sci Total Environ*; 754. Epub ahead of print 2021. DOI:  
339 10.1016/j.scitotenv.2020.142396.
- 340 17. Fortaleza CMCB, Guimarães RB, De Almeida GB, et al. Taking the inner route: Spatial and  
341 demographic factors affecting vulnerability to COVID-19 among 604 cities from inner São Paulo  
342 State, Brazil. *Epidemiol Infect*. Epub ahead of print 2020. DOI: 10.1017/S095026882000134X.
- 343 18. The New York Times. Coronavirus (Covid-19) Data in the United States. *Github*.
- 344 19. HRSA Bureau of Health Workforce. Area Health Resources File. *HRSA Data Warehouse*.
- 345 20. MIT Election Data and Science Lab. County Presidential Election Returns 2000-2016. *Harvard*  
346 *Dataverse*.
- 347 21. Ballotpedia. States that did not issue stay-at-home orders in response to the coronavirus (COVID-  
348 19) pandemic, 2020, [https://ballotpedia.org/Status\\_of\\_lockdown\\_and\\_stay-at-](https://ballotpedia.org/Status_of_lockdown_and_stay-at-home_orders_in_response_to_the_coronavirus_(COVID-19)_pandemic,_2020)  
349 [home\\_orders\\_in\\_response\\_to\\_the\\_coronavirus\\_\(COVID-19\)\\_pandemic,\\_2020](https://ballotpedia.org/Status_of_lockdown_and_stay-at-home_orders_in_response_to_the_coronavirus_(COVID-19)_pandemic,_2020) (2020, accessed  
350 15 November 2020).
- 351 22. USCB. Cartographic Boundary Files - Shapefile, [https://www.census.gov/geographies/mapping-](https://www.census.gov/geographies/mapping-files/time-series/geo/carto-boundary-file.html)  
352 [files/time-series/geo/carto-boundary-file.html](https://www.census.gov/geographies/mapping-files/time-series/geo/carto-boundary-file.html) (2019, accessed 27 October 2020).
- 353 23. Nayak A, Islam S, Mehta A, et al. Impact of Social Vulnerability on COVID-19 Incidence and  
354 Outcomes in the United States. *medRxiv Prepr Serv Heal Sci*. Epub ahead of print 2020. DOI:

- 355 10.1101/2020.04.10.20060962.
- 356 24. Fu L, Wang B, Yuan T, et al. Clinical characteristics of coronavirus disease 2019 (COVID-19) in  
357 China: A systematic review and meta-analysis. *J Infect* 2020; 80: 656–665.
- 358 25. Rodriguez-Diaz CE, Guilamo-Ramos V, Mena L, et al. Risk for COVID-19 infection and death  
359 among Latinos in the United States: examining heterogeneity in transmission dynamics. *Ann*  
360 *Epidemiol*. Epub ahead of print 2020. DOI: 10.1016/j.annepidem.2020.07.007.
- 361 26. Mollalo A, Vahedi B, Rivera KM. GIS-based spatial modeling of COVID-19 incidence rate in the  
362 continental United States. *Sci Total Environ*; 728. Epub ahead of print 2020. DOI:  
363 10.1016/j.scitotenv.2020.138884.
- 364 27. Allcott H, Boxell L, Conway J, et al. *Polarization and public health: Partisan Differences in*  
365 *Social Distancing during the Coronavirus Pandemic*. w26946, 2020.
- 366 28. Goolsbee A, Luo NB, Nesbitt R, et al. *COVID-19 Lockdown Policies at the State and Local*  
367 *Level*. 2020–116, 2020. Epub ahead of print 2020. DOI: 10.2139/ssrn.3682144.
- 368

369 **Table 1: Descriptive statistics of factors used in this study, as of October 27, 2020 (n = 3,101) using AHRF, NYT, CPER and CHR**  
 370 **datasets.**

371

| Ecological Factors                                             | Mean      | SD        |
|----------------------------------------------------------------|-----------|-----------|
| Incidence rate in per 1 Million (logged)                       | 10.07     | 0.53      |
| Incidence rate in per 1 Million                                | 26,575.75 | 12,216.59 |
| Mortality rate in per 1 Million (logged)                       | 6.18      | 0.80      |
| Mortality rate in per 1 Million                                | 631.59    | 477.64    |
| COVID-19 Policy- related factors                               |           |           |
| Length of order (quintiles) [n, %]*                            | <i>n</i>  | %         |
| 0 days (No order)                                              | 438.00    | 14.12     |
| 1 - 27 days                                                    | 469.00    | 15.12     |
| 28 - 35 days                                                   | 717.00    | 23.12     |
| 36 - 58 days                                                   | 714.00    | 23.02     |
| 59 or more days                                                | 736.00    | 24.60     |
| Calendar month of the first reported case in the state [n, %]* | <i>n</i>  | %         |
| January                                                        | 214.00    | 6.90      |
| February                                                       | 497.00    | 16.03     |
| March                                                          | 2,390.00  | 77.07     |
| Health behaviors                                               |           |           |
| % Adult Smoking                                                | 15.36     | 3.46      |
| % Physical Inactivity                                          | 23.25     | 5.37      |
| % Excessive Drinking                                           | 18.76     | 2.79      |
| % Influenza Vaccinations^                                      | 46.27     | 6.91      |
| Clinical Care                                                  |           |           |
| Primary Care Physicians Rate (log)                             | 4.23      | 0.51      |
| Preventable Hospitalization Rate (log)                         | 8.38      | 0.29      |
| Hospital Beds (log)                                            | 6.45      | 3.29      |
| Socio-economic factors                                         |           |           |
| % Republicans                                                  | 46.63     | 16.77     |
| Counties leaning Republican (>50% votes) [n, %]                | 2,500.00  | 80.62     |



|                                                  |        |       |
|--------------------------------------------------|--------|-------|
| % Adult Obesity                                  | 29.23  | 5.45  |
| Premature Age Adjusted Mortality <sup>#</sup>    | 343.74 | 92.96 |
| Income Inequality Ratio                          | 4.67   | 0.68  |
| % Adults with Some College Education             | 65.28  | 9.79  |
| % Unemployment                                   | 3.95   | 1.13  |
| % Children in Single-parent Households           | 32.99  | 8.58  |
| Social Association Rate                          | 9.09   | 3.57  |
| % Uninsured Adults                               | 12.42  | 6.00  |
| Median Income per \$1,000 (log)                  | 4.14   | 0.26  |
| % 65 years old and over                          | 16.05  | 4.08  |
| % less than 18 years of age                      | 22.49  | 2.91  |
| % African American                               | 12.30  | 12.56 |
| % Native Americans                               | 1.23   | 3.22  |
| % Hispanic                                       | 18.06  | 17.19 |
| % Female                                         | 50.72  | 1.22  |
| % Not proficient in English                      | 4.19   | 4.20  |
| <b>Physical environment</b>                      |        |       |
| Air pollution-particulate matter (2.5)           | 10.09  | 2.13  |
| % Severe Housing Problem                         | 17.72  | 5.41  |
| Residential Segregation- African Americans/White | 50.67  | 12.82 |
| Residential Segregation- non-White/White         | 36.73  | 11.25 |
| % Rural                                          | 19.18  | 24.18 |
| % Homeownership                                  | 64.57  | 9.54  |
| Population density per 100 sq. miles (log)       | 6.12   | 1.55  |

372 Abbreviations: AHRF: 2018-2019 Area Health Resource Files; 2020 NYT: New York Times; 2020 CHR: County Health Rankings; and CPER: 2016 County Presidential  
373 Election Returns; SD: Standard Deviation.

374 \* Unweighted as this represents the number of counties; ^: Among Medicare enrollees; #: Number of deaths among residents under age 75 per 100,000 population (age-  
375 adjusted).

376

377  
378

**Table 2: SAC model for the incidence rates (logged) and Spatial Lag Model for mortality rates (logged) as of October 27, 2020 using NYT, AHRF, CPER and CHR datasets.**

| Ecological Factors                                     | Incidence Rates  |       | Mortality Rates  |       |
|--------------------------------------------------------|------------------|-------|------------------|-------|
|                                                        | Estimate         | SE    | Estimate         | SE    |
| <b>COVID-19 Policy- related factors</b>                |                  |       |                  |       |
| Length of order (quintiles)                            | <i>Reference</i> |       | <i>Reference</i> |       |
| 0 days (No order)                                      |                  |       |                  |       |
| 1 - 27 days                                            | -0.290 ***       | 0.079 | -0.483           | 0.257 |
| 28 - 35 days                                           | -0.135           | 0.070 | -0.824 ***       | 0.218 |
| 36 - 58 days                                           | -0.228 **        | 0.071 | -0.866 ***       | 0.206 |
| 59 or more days                                        | -0.335 ***       | 0.081 | -1.006 ***       | 0.229 |
| Calendar month of the first reported case in the state | <i>Reference</i> |       | <i>Reference</i> |       |
| January                                                |                  |       |                  |       |
| February                                               | -0.056           | 0.092 | -0.628 *         | 0.297 |
| March                                                  | 0.054            | 0.083 | -0.249           | 0.274 |
| <b>Health behaviors</b>                                |                  |       |                  |       |
| % Adult Smoking                                        | -0.003           | 0.005 | 0.036            | 0.033 |
| % Physical Inactivity                                  | 0.002            | 0.002 | 0.017            | 0.014 |
| % Excessive Drinking                                   | 0.000            | 0.005 | 0.107 ***        | 0.026 |
| % Influenza Vaccinations^                              | 0.003 ***        | 0.001 | 0.039 ***        | 0.007 |
| <b>Clinical Care</b>                                   |                  |       |                  |       |
| Primary Care Physicians Rate (log)                     | 0.011 **         | 0.004 | 0.234 ***        | 0.031 |
| Preventable Hospitalization Rate (log)                 | 0.045 *          | 0.022 | 0.183            | 0.166 |
| Hospital Beds (log)                                    | 0.004 **         | 0.001 | 0.033 **         | 0.011 |
| <b>Socio-economic factors</b>                          |                  |       |                  |       |
| % Republicans                                          | 0.002 *          | 0.001 | 0.017 *          | 0.007 |
| % Adult Obesity                                        | -0.001           | 0.002 | -0.007           | 0.013 |
| Premature Age Adjusted Mortality <sup>#</sup>          | 0.000            | 0.000 | -0.001           | 0.001 |
| Income Inequality Ratio                                | 0.018            | 0.011 | 0.120            | 0.094 |
| % Adults with Some College Education                   | -0.004 ***       | 0.001 | -0.041 ***       | 0.008 |
| % Unemployment                                         | -0.014           | 0.008 | -0.019           | 0.055 |
| % Children in Single-parent Households                 | -0.003 *         | 0.001 | 0.018 *          | 0.009 |
| Social Association Rate                                | 0.003 *          | 0.001 | 0.011            | 0.010 |
| % Uninsured Adults                                     | 0.001            | 0.003 | 0.038 *          | 0.019 |
| Median Income per \$1,000 (log)                        | -0.158 *         | 0.078 | -0.393           | 0.509 |

|                                                  |         |     |       |          |       |
|--------------------------------------------------|---------|-----|-------|----------|-------|
| % 65 years old and over                          | -0.020  | *** | 0.003 | -0.043   | 0.025 |
| % less than 18 years of age                      | -0.011  | **  | 0.004 | -0.025   | 0.030 |
| % African American                               | 0.007   | *** | 0.002 | 0.032    | ***   |
| % Native Americans                               | 0.008   | *** | 0.002 | 0.034    | **    |
| % Hispanic                                       | 0.015   | *** | 0.002 | 0.037    | ***   |
| % Female                                         | -0.007  |     | 0.004 | 0.101    | **    |
| % Not proficient in English                      | 0.010   | *   | 0.005 | -0.019   | 0.038 |
| <b>Physical environment</b>                      |         |     |       |          |       |
| Air pollution-particulate matter (2.5)           | 0.062   | *** | 0.012 | 0.130    | **    |
| % Severe Housing Problem                         | 0.004   |     | 0.003 | 0.009    | 0.021 |
| Residential Segregation- African Americans/White | -0.002  | **  | 0.001 | -0.010   | *     |
| Residential Segregation- non-White/White         | 0.003   | *** | 0.001 | 0.014    | *     |
| % Rural                                          | -0.001  | **  | 0.000 | -0.014   | ***   |
| % Homeownership                                  | 0.002   |     | 0.001 | 0.051    | ***   |
| Population density per 100 sq. miles (log)       | 0.028   | *   | 0.012 | 0.270    | ***   |
| $\rho$ (spatial lag parameter)                   | -0.563  | *** |       | 0.179    | ***   |
| $\lambda$ (spatial error parameter)              | 0.936   | *** |       |          |       |
| AIC                                              | 2993.60 |     |       | 15382.00 |       |
| Observed Moran's I for residuals                 | -0.032  |     |       | -0.006   |       |

379

380 Abbreviations: SAC: Spatial Autoregressive Combined; AHRF: 2018-2019 Area Health Resource Files; 2020 NYT: New York Times; CHR: 2020 County Health  
381 Rankings; 2016 CPER: County Presidential Elections Results.

382 ^: Among Medicare enrollees; #: Number of deaths among residents under age 75 per 100,000 population (age-adjusted).

383 Level of significance: \*p-value < 0.05, \*\*p-value < 0.01, \*\*\*p-value < 0.001.

384

385

**Figure 1: Theoretical framework based on the county health rankings model to establish a relationship between COVID-19 incidence and mortality, and county-level ecological factors**

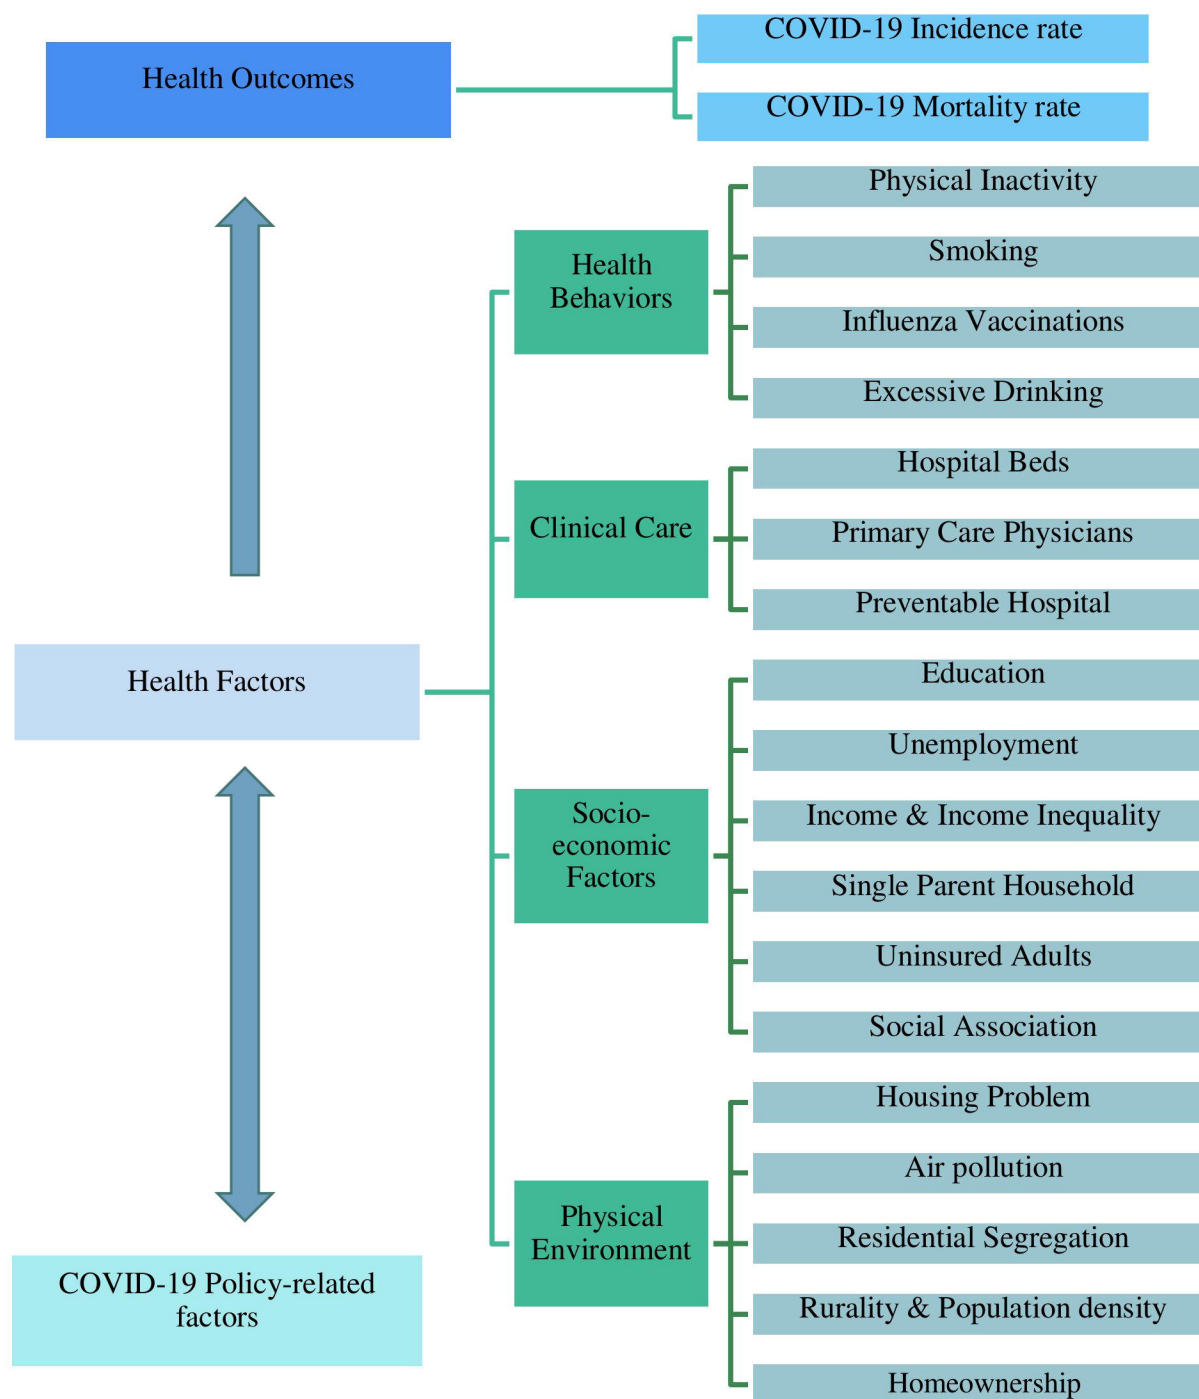



Figure 2: Spatial distribution of the logged cumulative COVID-19 incidence rates by septiles, as of October 27, 2020.

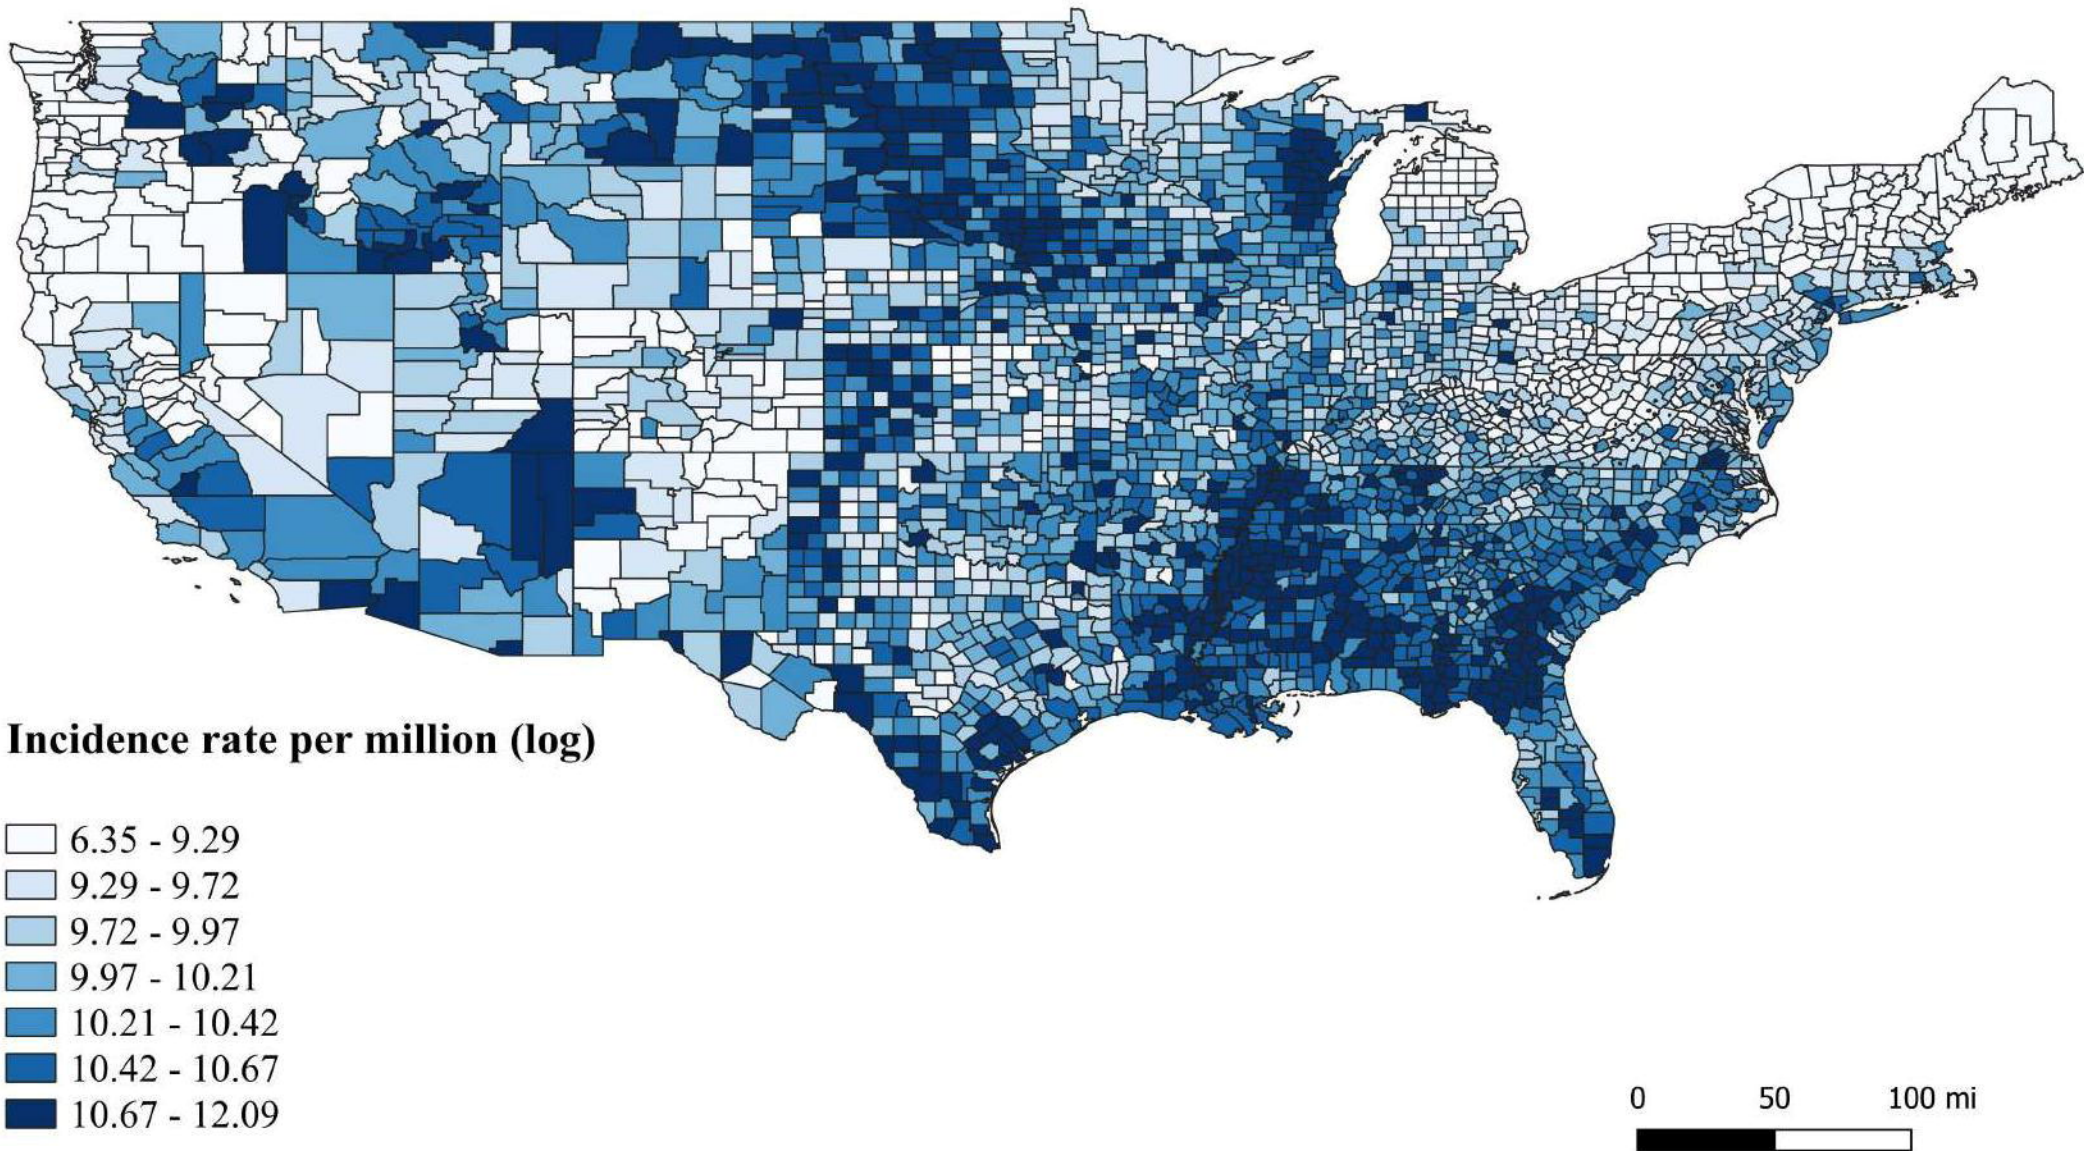



**Figure 3: Spatial distribution of the logged cumulative COVID-19 mortality by septiles as of October 27, 2020.**

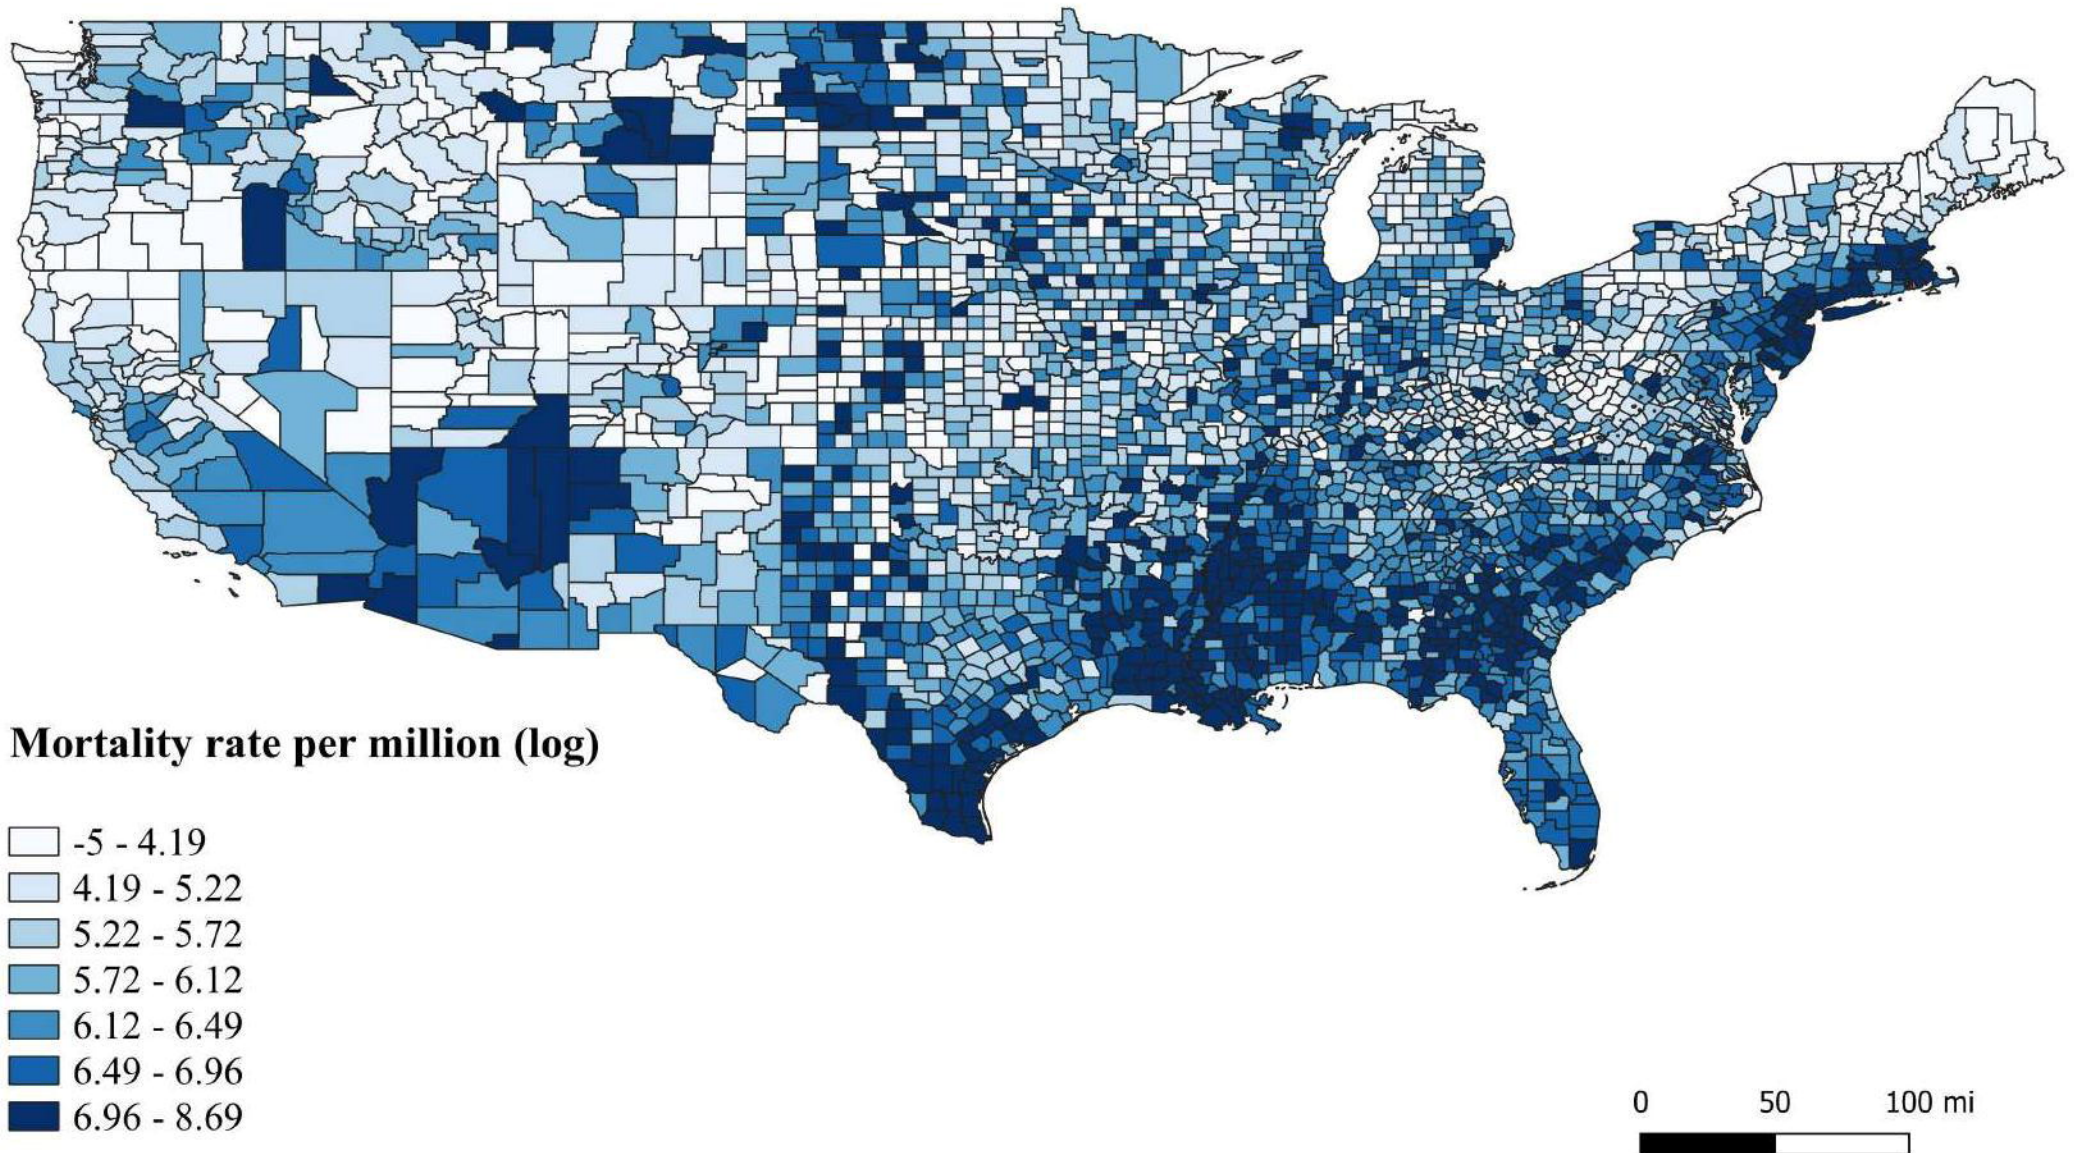

Source: http://medrxiv.org/content/10.1101/2020.12.02.20242685v2.full.pdf
